# Supplementary material for: Fabrication of core–shell AuNP@UIO-66/Au nanoparticles for in situ SERS monitoring of the degradation process
Source: Royal Society of Chemistry journal article supplement (doi:10.1039/d3nj04016j), 2023-01-01
Supplement: d3nj04016j1.pdf [file d3nj04016j1.pdf]

## Supporting Information

### **Fabrication of core-shell AuNP@UIO-66/Au nanoparticles for *in situ* SERS monitoring the degradation process**

**Zhou-Ya Wu<sup>a</sup>, Meng-Meng Zhang<sup>a</sup>, Yuan-Yuan Yang<sup>b</sup>, Sheng Han<sup>a\*</sup>, Yuan-Ting Li<sup>a\*</sup>**

<sup>a</sup> School of Chemical and Environmental Engineering, Shanghai Institute of Technology,  
Shanghai 201418, P. R. China

<sup>b</sup> College of Environmental Science & Engineering, Tongji University, 1239 Siping  
Road, Shanghai 200092, China

\*Corresponding author:

Sheng Han; Yuan-Ting Li

School of Chemical and Environmental Engineering

Shanghai Institute of Technology

No. 100 Haiquan Road

Shanghai, 201418, P. R. China

Tel/Fax: + 086 21 60873241

E-mail: hansheng654321@sina.com (S. Han); joyce319@hotmail.com (Y.T. Li)

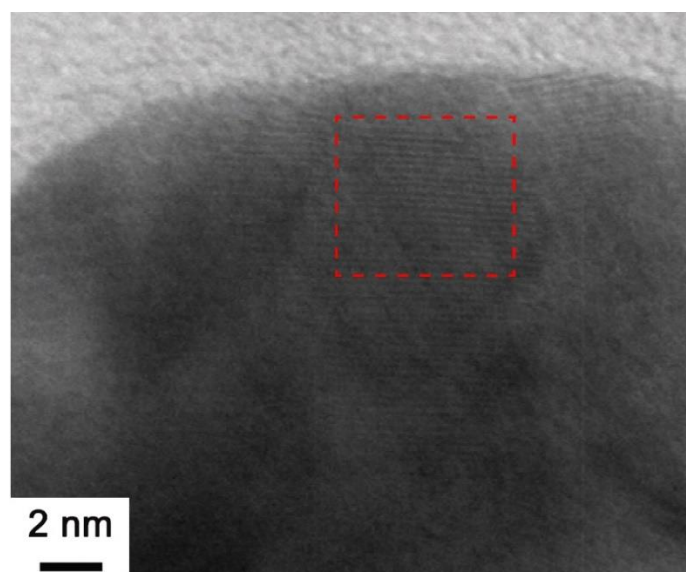

**Fig. S1.** HRTEM images of core-shell AuNP@UIO-66 nanoparticles.

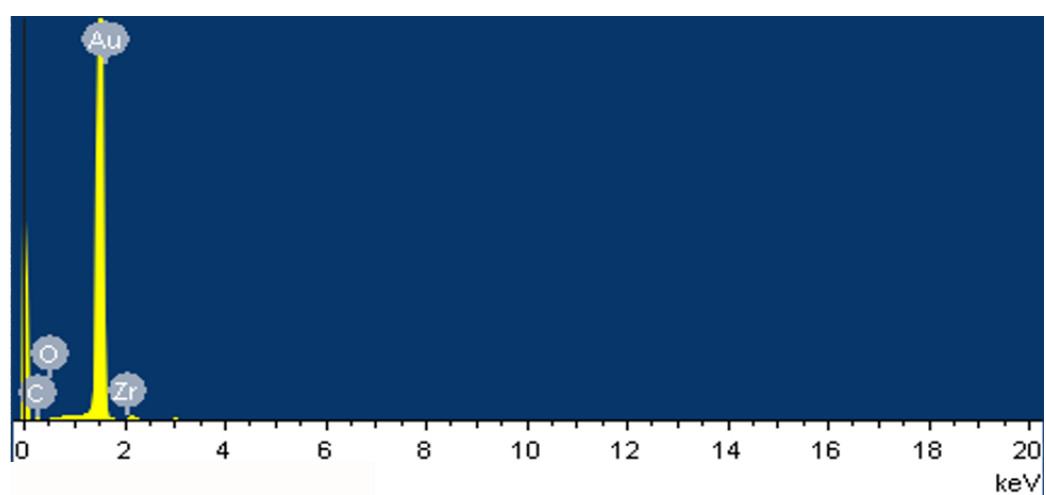

**Fig. S2.** EDS spectrum of Au@UIO-66/Au nanoparticles.

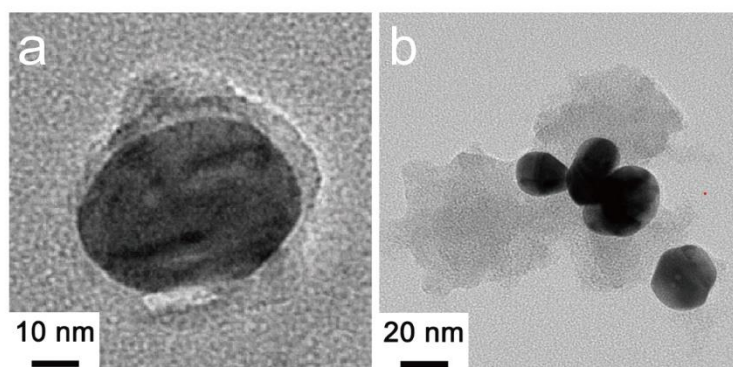

**Fig. S3.** TEM images of AuNP@UIO-66 nanoparticles fabricated with different volume ratio of  $\text{HAuCl}_4$  to MOF precursor solution (a) 35:1 and (b) 10:1.

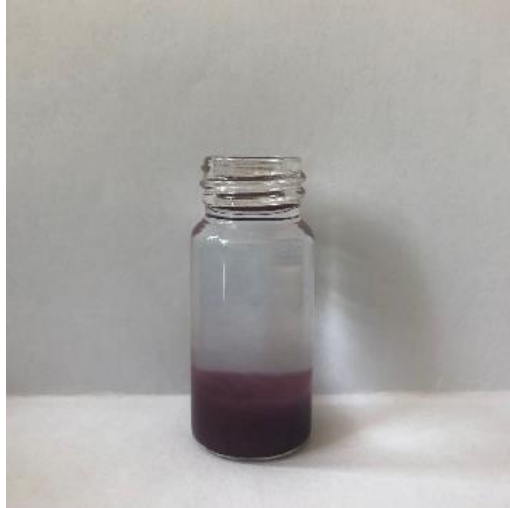

**Fig. S4.** Image of AuNP@PVP colloidal solution.

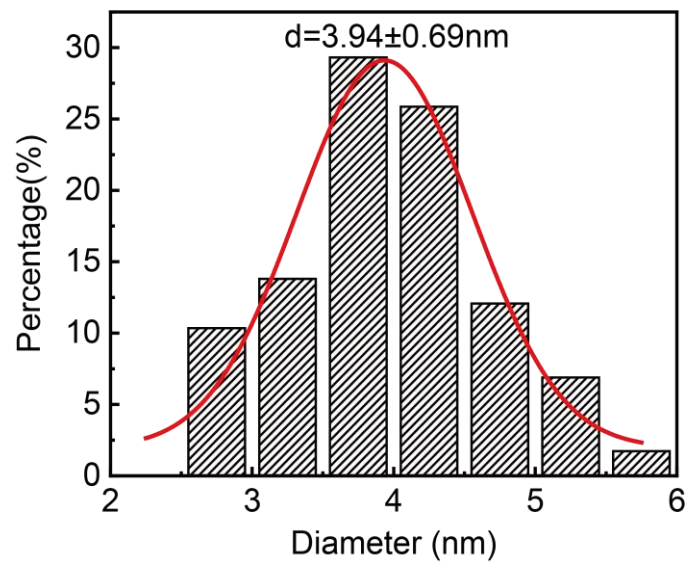

**Fig. S5.** The size distribution of AuNPs loading on the surface of AuNP@UIO-66.

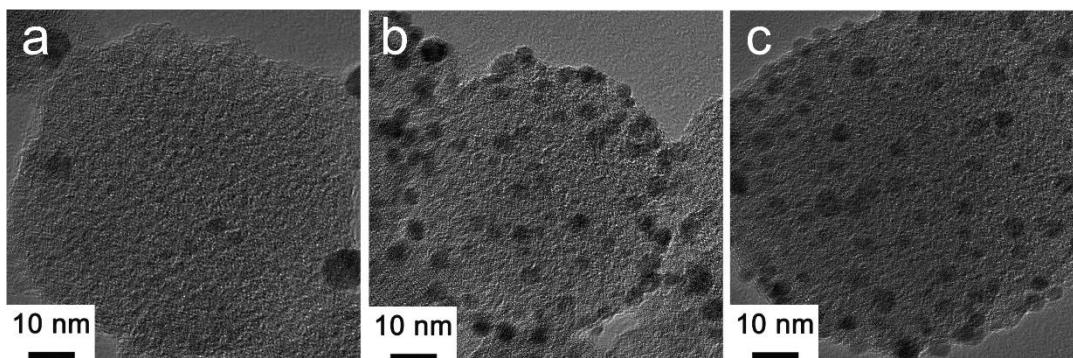

**Fig. S6.** TEM images of AuNP@UIO-66/Au after loading with 4 nm AuNPs at the reaction time (a) 6 h, (b) 12 h and (c) 24 h.

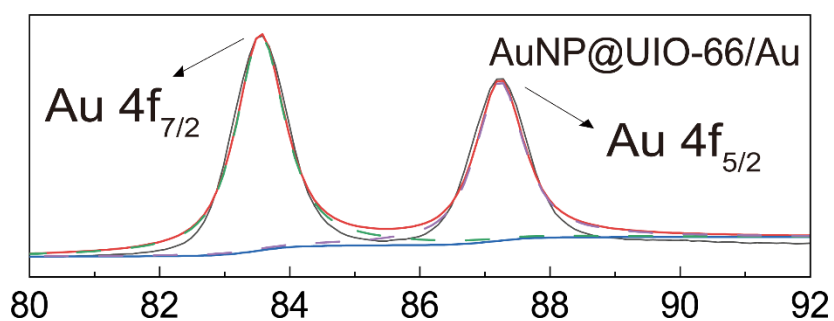

**Fig. S7.** XPS spectra for Au 4f of AuNP@UIO-66/Au.

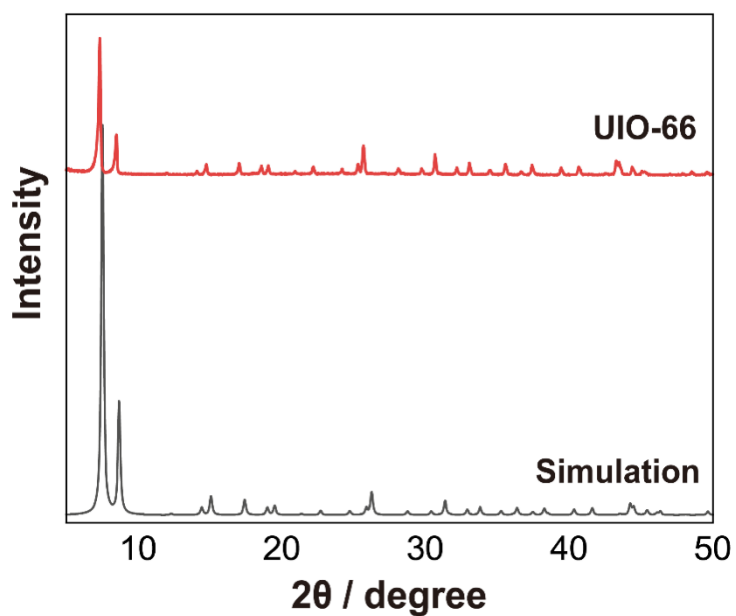

**Fig. S8.** The XRD pattern of the as-prepared UIO-66 powder and the simulation pattern.

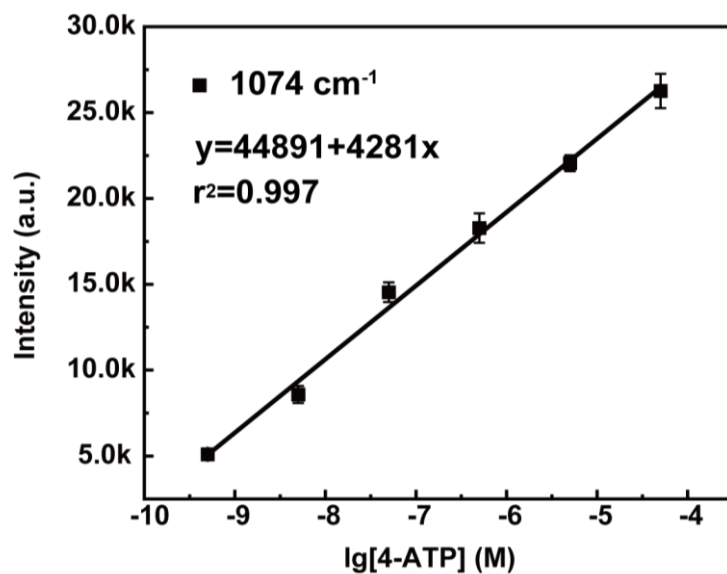

**Fig. S9.** The linear relationship of SERS intensities versus concentration of 4-ATP at  $1074 \text{ cm}^{-1}$ .

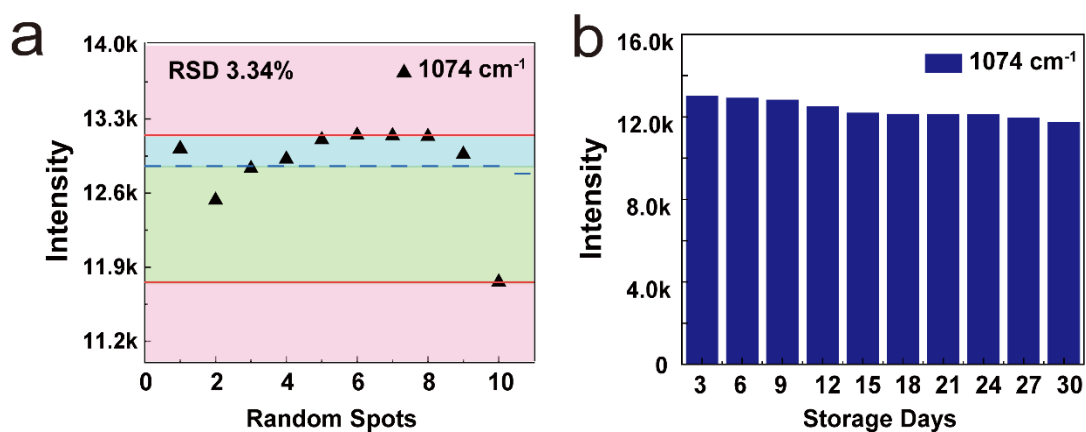

**Fig. S10.** (a) The corresponding SERS intensity distribution statistics of the  $1074 \text{ cm}^{-1}$  band. The average intensity is indicated by the blue line. (b) The relationships between SERS intensity at  $1074 \text{ cm}^{-1}$  of  $10^{-7} \text{ M}$  4-ATP and the storage days.

## S1. EF calculation.

According to the procedure outlined in earlier papers<sup>1-2</sup>, the enhancement factor (EF) can be calculated from  $EF = (I_{SERS}/N_{SERS}) / (I_{Raman}/N_{Raman})$ , where  $I_{SERS}$ ,  $I_{Raman}$ ,  $N_{SERS}$ , and  $N_{Raman}$  stand for, respectively, SERS intensity, Raman intensity, number of molecules being probed in SERS, and number of molecules being probed in Raman.

In this paper, the  $V_{SERS}$  are set as 3  $\mu\text{L}$ , ensuring that the analytes are within the focus of the laser beam. The relative molecular mass of purchased 4-ATP is 155.17 g/mol. For the solid sample, the sampling volume is the product of the area of the laser spot (10  $\mu\text{m}$  diameter) and the penetration depth (2  $\mu\text{m}$ ) of the focused laser beam. Assuming the density of bulk 4-ATP is 1.14 g  $\text{cm}^{-3}$ ,  $N_{Raman}$  can be calculated to be  $6.92 \times 10^{11}$  ( $N_{Raman} = 1.14 \text{ g/cm}^3 \times \pi \times 25 \mu\text{m}^2 \times 2 \mu\text{m} \times N_A / 155.17 \text{ g/mol} = 6.92 \times 10^{11}$ ).

In this paper, 3  $\mu\text{L}$  of  $10^{-7}$  M 4-ATP solution left a spot of ca. 2.7 mm in diameter.  $N_{SERS}$  can be calculated to be  $2.48 \times 10^5$  ( $N_{SERS} = 10^{-7} \text{ mol/L} \times 3 \mu\text{L} \times N_A / (1.35 \text{ mm})^2 / \pi \times (25 \mu\text{m}^2 \times \pi) = 2.48 \times 10^5$ ). In these Raman peaks, the maximum enhancement is observed at  $1074 \text{ cm}^{-1}$ , which was chosen to estimate the EF of SERS substrate according to the method previously reported. Since the ratio of  $I_{SERS}$  to  $I_{Raman}$  was approximately 23.4 (**Fig. S11**), EF was calculated to be  $23.4 \times (6.92 \times 10^{11} / 2.48 \times 10^5) = 6.53 \times 10^7$ .

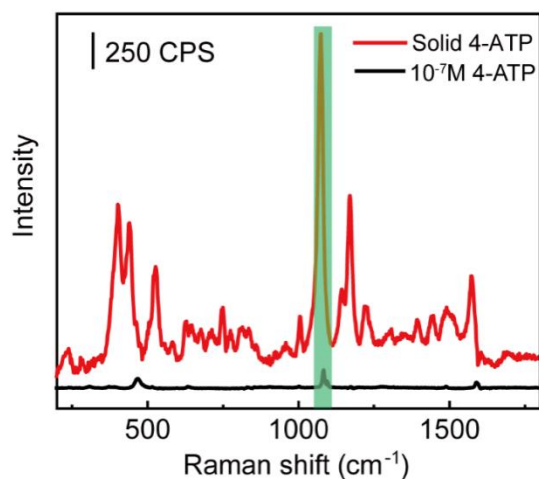

**Fig. S11.** SERS spectra of  $10^{-7}$  M 4-ATP recorded on AuNP@UIO-66/Au, and the normal Raman spectra of solid 4-ATP.

## S2. 2D Finite-difference time-domain (FDTD) simulation.

The electromagnetic field enhancement of AuNP@UIO-66/Au was simulated with the 2D-FDTD software (Lumerical, Canada). The structural parameters were set according to the acquired experimental data. The permittivity of AuNP was described by LorentzDrude model<sup>4</sup>:

A total-field scattered-field (TFSF) source propagating parallel to the Z-axis was applied with polarization along the X-axis and Y-axis to satisfy phase ( $E_x$ ) = 0 and phase ( $E_y$ ) = +90. Perfectly matched layers (PMLs) were adopted for the Z-axis<sup>5</sup>. The simulation region was a  $320 \times 260 \times 260$  nm<sup>3</sup> cuboid space surrounded by 12 absorber layers to avoid numerical reflections.

**Table S1.** The porosity analysis of the UIO-66 and AuNP@UIO-66/Au.

| Samples        | BET surface area (m <sup>2</sup> /g) | Lagmuir surface area (m <sup>2</sup> /g) | Total pore volume (ml/g) | Pore size (nm) |
|----------------|--------------------------------------|------------------------------------------|--------------------------|----------------|
| UIO-66         | 1232.9635                            | 1795.6702                                | 0.7115                   | 1.1638         |
| AuNP@UIO-66/Au | 898.5733                             | 1308.4256                                | 1.1372                   | 1.3503         |

**Table S2.** An overview on recently reported methods for 4-ATP determination.

| Materials                                                                  | LOD                     | EF                   | Ref.      |
|----------------------------------------------------------------------------|-------------------------|----------------------|-----------|
| AuNP@UIO-66/Au                                                             | 1.1×10 <sup>-11</sup> M | 6.53×10 <sup>7</sup> | this work |
| Ip <sub>6</sub> @Au                                                        | 1.0×10 <sup>-7</sup> M  | -                    | 6         |
| SiO <sub>2</sub> @Ag@SiO <sub>2</sub>                                      | 1.0×10 <sup>-7</sup> M  | -                    | 7         |
| Fe <sub>3</sub> O <sub>4</sub> @SiO <sub>2</sub> -SO <sub>3</sub> H@PPy@Au | 1.0×10 <sup>-6</sup> M  | 4.9×10 <sup>4</sup>  | 8         |

**Table S3.** Corresponding band assignments of 4-AP, DHAB and 4-NP.<sup>9</sup>

| SERS (cm <sup>-1</sup> ) | Assignments             |
|--------------------------|-------------------------|
| 1110                     | v (C-C)+β (C-H)         |
| 1146                     | v (C-C)+β (C-N)         |
| 1335                     | v (NO <sub>2</sub> )    |
| 1382                     | v (N-N)+v (C-C)+β (C-H) |
| 1441                     | v (N-N)+v (C-C)+β (C-H) |
| 1488                     | v (C-C)+β (C-H)         |
| 1576                     | v (C-C)                 |
| 1598                     | v (C-C)                 |

v: stretching; β: in-plane bending



**Table S4.** An overview on recently reported methods for the reduction reaction.

| Materials                            | Analytes        | Amount of NaBH <sub>4</sub> | Reaction Time | Ref       |
|--------------------------------------|-----------------|-----------------------------|---------------|-----------|
| AuNP@UIO-66/Au                       | 5 mM<br>4-NP    | 10 μM                       | 10 min        | this work |
| Au-m-Co <sub>3</sub> O <sub>4</sub>  | 0.5 mM 4-<br>NP | 0.2 M                       | 5 min         | 10        |
| PLAL-AuNPs/CeO <sub>2</sub> -<br>NTs | 0.12 mM<br>4-NP | 5 mM                        | 20 min        | 11        |
| AgNPs@GO/PET                         | 10 mM<br>4-NP   | 1.0 M                       | 20 min        | 12        |
| Ag@AgCl                              | 1 mM<br>4-NTP   | 0.1 M                       | 14 min        | 13        |
| Ag@AuNWs                             | 5 mM<br>4-NTP   | 10 μM                       | 20 min        | 14        |

**Table S5.** Corresponding band assignments of CV.<sup>15</sup>

| SERS (cm <sup>-1</sup> ) of CV | SERS (cm <sup>-1</sup> ) of CV after the addition of H <sub>2</sub> O <sub>2</sub> | Assignments                         |
|--------------------------------|------------------------------------------------------------------------------------|-------------------------------------|
| 416                            | 416                                                                                | γ (C <sup>+</sup> -phenyl)          |
| 434                            | 433                                                                                | γ (Ph-C <sup>+</sup> -Ph)           |
| 552                            | 554                                                                                | Ring skeletal vibration             |
| 719                            | 718                                                                                | γ (C-H)                             |
| 794                            | 797                                                                                | Out-of-plane ring C-H               |
| -                              | 870                                                                                | -                                   |
| 908                            | 912                                                                                | Ring skeletal vibration             |
| 936                            | --                                                                                 | Ring skeletal vibration             |
| 1172                           | 1174                                                                               | β (C-H)                             |
| 1183                           | 1191                                                                               | ν (C-C)                             |
| 1364                           | 1366                                                                               | ν (N-phenyl)                        |
| 1437                           | 1445                                                                               | ν (C-C) + ring deformation          |
| 1532                           | 1536                                                                               | ν (N <sup>+</sup> -phenyl)+ ν (C-C) |
| 1583                           | 1584                                                                               | ν (C-C) + ν (C-C)                   |
| 1615                           | 1616                                                                               | ν (C-C) + ν (C-N)                   |

ν: stretching; β: bending in-plane; γ: bending out-of-plane

## References

- 1 B. Fazio, C. D'Andrea, A. Foti, E. Messina, A. Irrera, M. G. Donato, V. Villari, N. Micali, O. M. Maragò and P. G. Gucciardi, *Scientific Reports*, **2016**, *6*, 26952.
- 2 E. C. Le Ru, E. Blackie, M. Meyer and P. G. Etchegoin, *The Journal of Physical Chemistry C*, **2007**, *111*, 13794-13803.
- 3 M. Jiang, Z. Qian, X. Zhou, X. Xin, J. Wu, C. Chen, G. Zhang, G. Xu and Y. Cheng, *PCCP*, **2015**, *17*, 21158-21163.
- 4 M. G. Blaber, M. D. Arnold and M. J. Ford, *The Journal of Physical Chemistry C*, **2009**, *113*, 3041-3045.
- 5 M. Su, C. Wang, T. Wang, Y. Jiang, Y. Xu and H. Liu, *Anal Chem*, **2020**, *92*, 6941-6948.
- 6 L. Zhang, Y. j. Weng, X. Liu, W. Gu, X. Zhang and L. Han, *Scientific Reports*, **2020**, *10*, 5752.
- 7 M. G. Cha, H.-M. Kim, Y.-L. Kang, M. Lee, H. Kang, J. Kim, X.-H. Pham, T. H. Kim, E. Hahm, Y.-S. Lee, D. H. Jeong and B.-H. Jun, *PLOS ONE*, **2017**, *12*, e0178651.
- 8 G. Ren, M. Shang, H. Zou and W. Wang, *Mater Chem Phys*, **2016**, *173*, 333-339.

- 9 M. Muniz-Miranda, *Applied Catalysis B: Environmental*, **2014**, *146*, 147-150.
- 10 S. Zhou, C. Liu, W. Jin, L. Pan, Q. Jiang, Y. Hu and Y. Kong, *ACS Applied Nano Materials*, **2021**, *4*, 4763-4773.
- 11 J. Zhang, G. Chen, M. Chaker, F. Rosei and D. Ma, *Applied Catalysis B: Environmental*, **2013**, *132-133*, 107-115.
- 12 K. Sharma, M. Ali, R. Singh, S. Majhi, S. Sharma, C. S. P. Tripathi and D. Guin, *J Phys Chem Solids*, **2022**, *165*, 110640.
- 13 Y. Lu, J. Mao, Z. Wang, Y. Qin and J. Zhou, *Catalysts*, **2020**, *10*, 746.
- 14 Y. Zhu, H. Tang, H. Wang and Y. Li, *Anal Chem*, **2021**, *93*, 11736-11744.
- 15 M. Vinod, K.G. Gopchandran, *Progress in Natural Science: Materials International*, **2014**, *24*, 569–578.
